# Supplementary material for: Cleavage of aryl–ether bonds in lignin model compounds using a Co–Zn-beta catalyst
Source: Royal Society of Chemistry journal article supplement (doi:10.1039/d0ra08121c), 2020-01-01
Supplement: d0ra08121c1.pdf [file d0ra08121c1.pdf]

## Supplementary information

### **Cleavage of aryl-ether bonds in lignin model compounds using a Co-Zn-beta catalyst**

Xiaomeng Dou<sup>a</sup>, Wenzhi Li<sup>a\*</sup>, Chaofeng Zhu<sup>b</sup>, Xiao Jiang<sup>c</sup>, Hou-min Chang<sup>c</sup> and Hasan Jameel<sup>c</sup>

<sup>a</sup> Laboratory of Basic Research in Biomass Conversion and Utilization, University of Science and Technology of China, Hefei 230026, PR China.

<sup>b</sup> Hefei National Laboratory for Physics Science at Microscale, School of Chemistry and Materials Science, University of Science and Technology of China, Hefei 230026, PR China.

<sup>c</sup> Department of Forest Biomaterials, North Carolina State University, Raleigh, NC 27695-8005, USA.

\* Corresponding author.

E-mail address: liwenzhi@ustc.edu.cn

## **TABLE OF CONTENTS**

1. **Fig. S1** MS data of BPE and its degradation products.
2. **Fig. S2** GC of degradation products of BPE at 240 °C.
3. **Fig. S3** GC of degradation products of BPE at 240 °C without catalyst.
4. **Fig. S4** MS data of PPE and its degradation products.
5. **Fig. S5** GC of degradation products of PPE at 240 °C.
6. **Fig. S6** GC of degradation products of PPE at 260 °C.
7. **Fig. S7** GC of degradation products of PPE at 260 °C without catalyst.
8. **Fig. S8** A possible distorted transition state for a direct [1, 5] shift of PPE.
9. **Fig. S9** MS data of PPPD and its degradation products.
10. **Fig. S10** GC of degradation products of PPPD at 200 °C.
11. **Fig. S11** GC of degradation products of PPPD at 200 °C without catalyst.

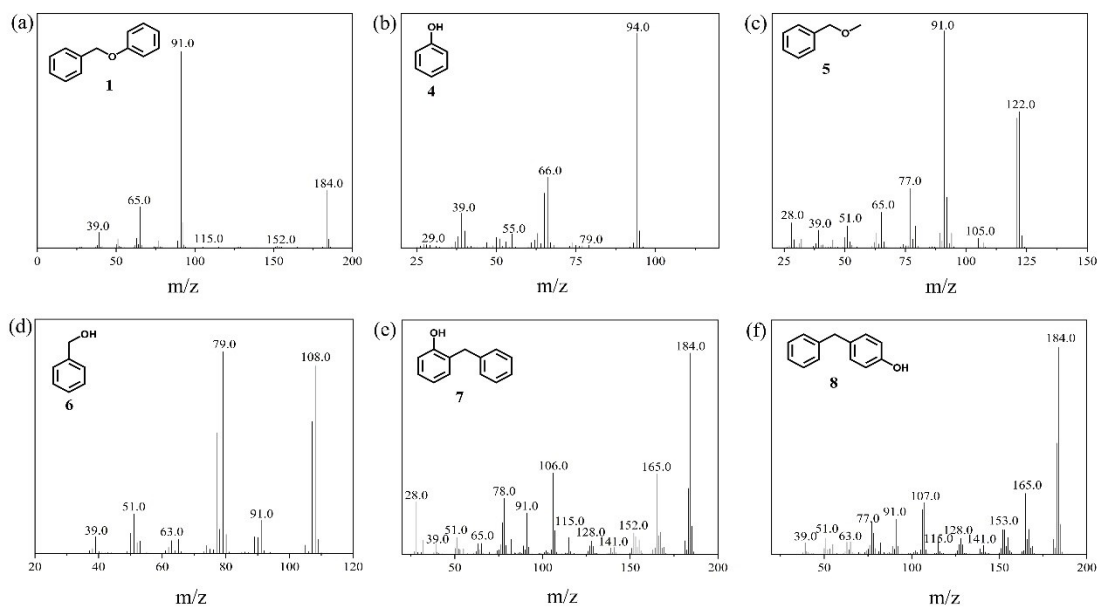

**Fig. S1** MS data of BPE and its degradation products.

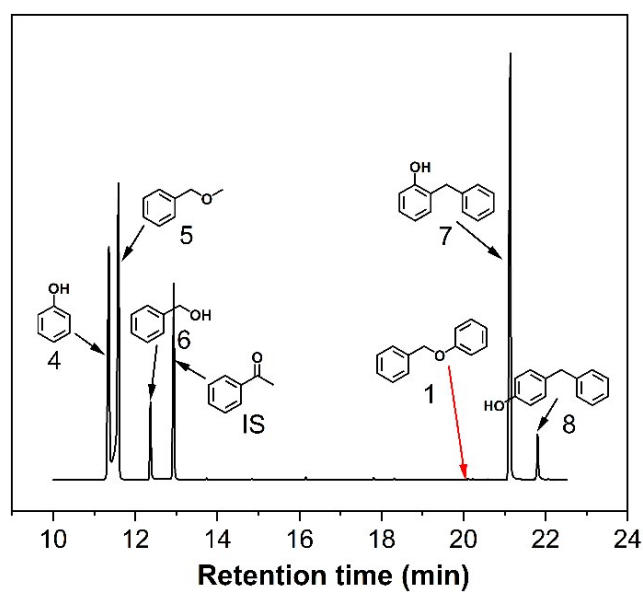

**Fig. S2** GC of degradation products of BPE at 240 °C.

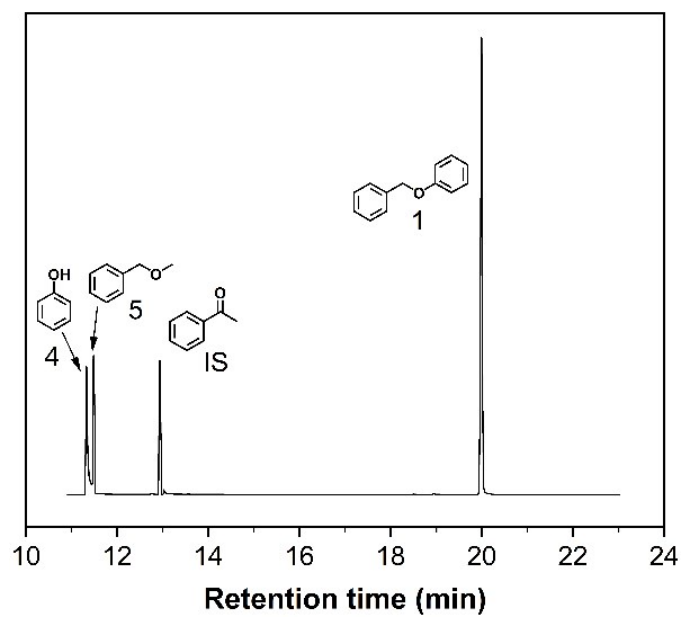

**Fig. S3** GC of degradation products of BPE at 240 °C without catalyst.

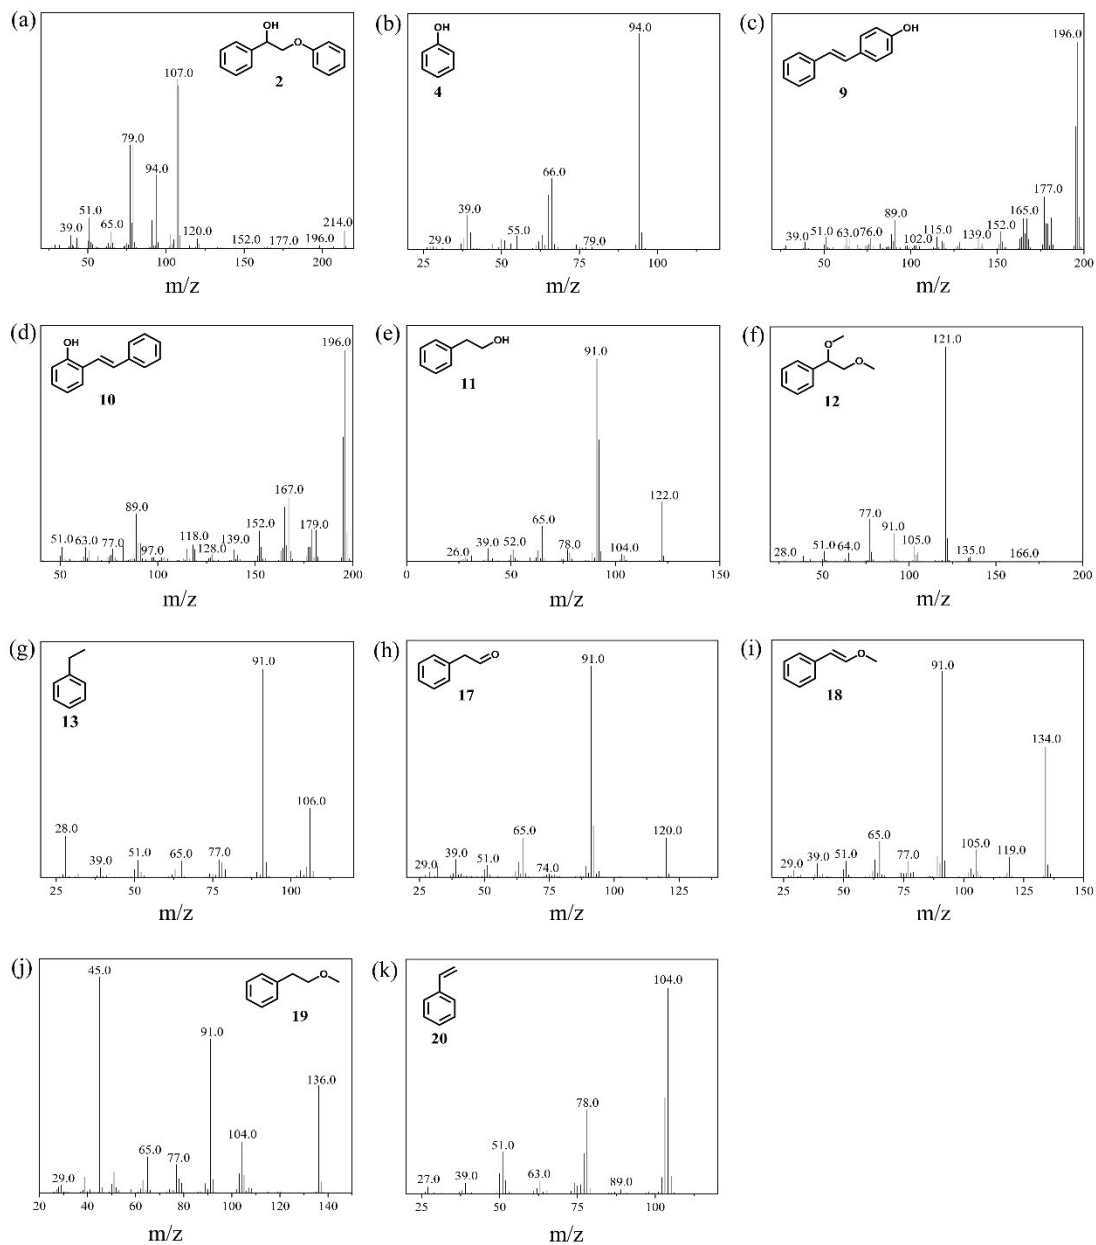

**Fig. S4** MS data of PPE and its degradation products.

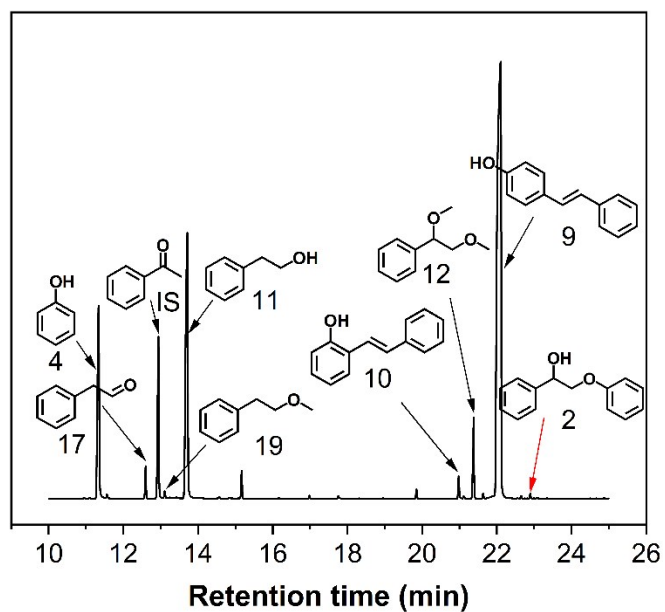

**Fig. S5** GC of degradation products of PPE at 240 °C.

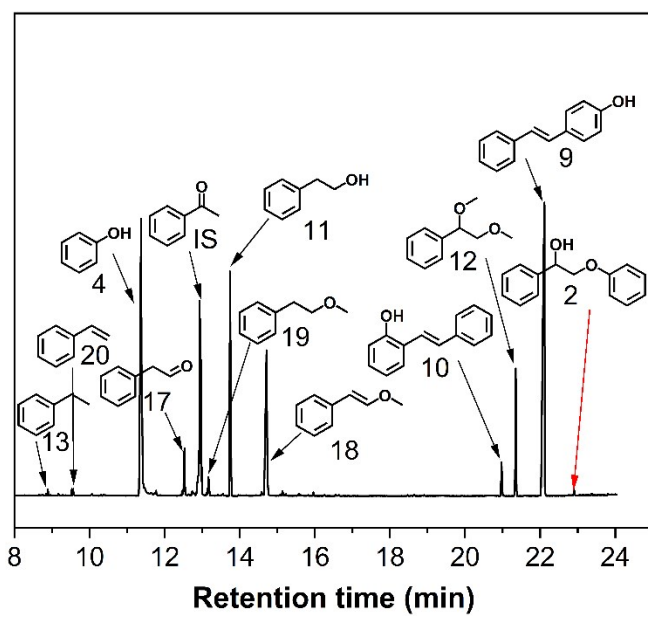

**Fig. S6** GC of degradation products of PPE at 260 °C.

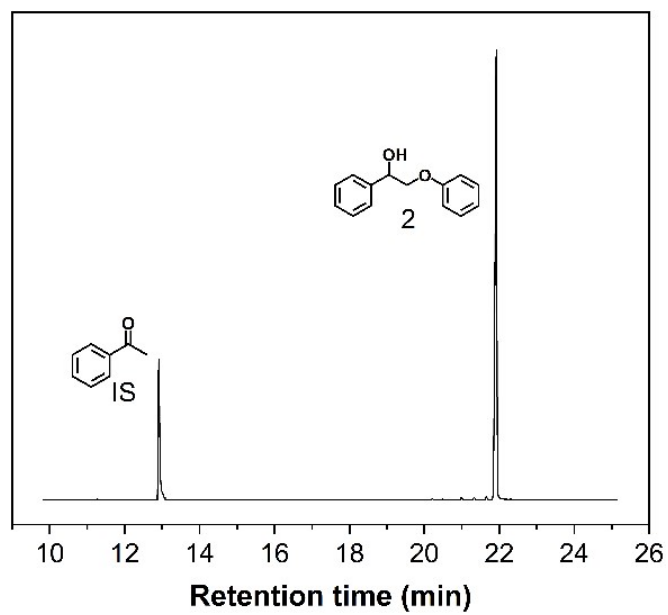

**Fig. S7** GC of degradation products of PPE at 260 °C without catalyst.

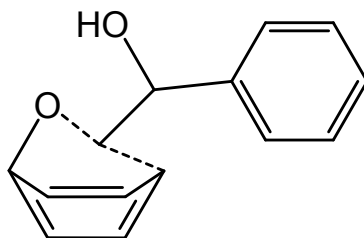

**Fig. S8** A possible distorted transition state for a direct [1, 5] shift of PPE.

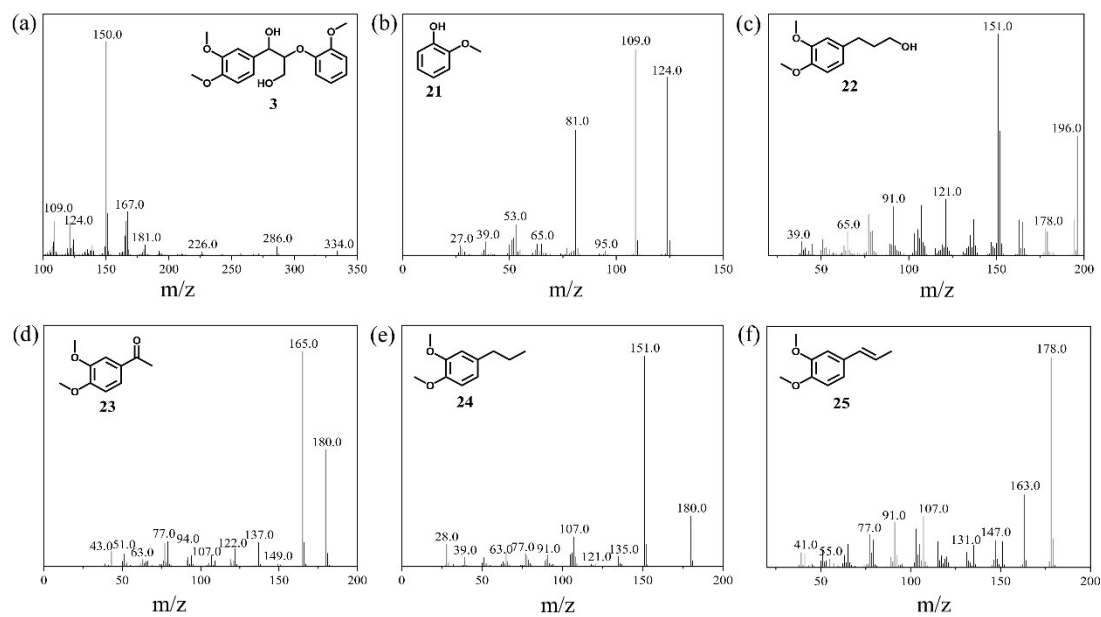

**Fig. S9** MS data of PPPD and its degradation products.

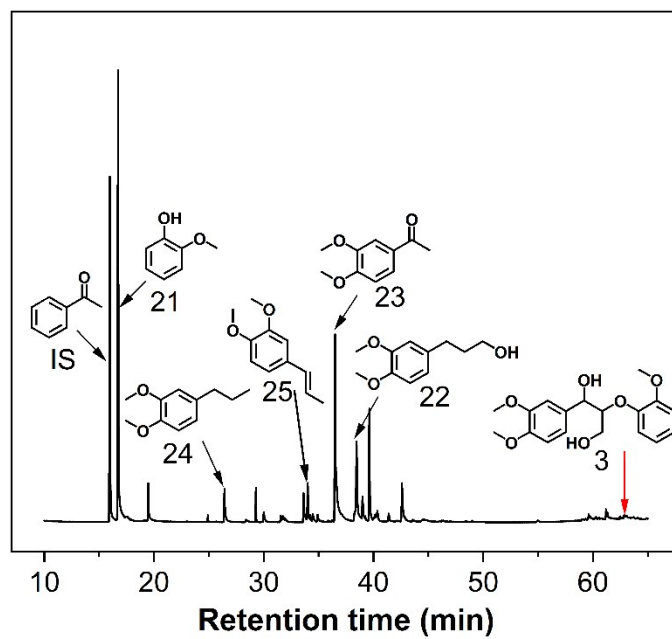

**Fig. S10** GC of degradation products of PPPD at 200 °C.



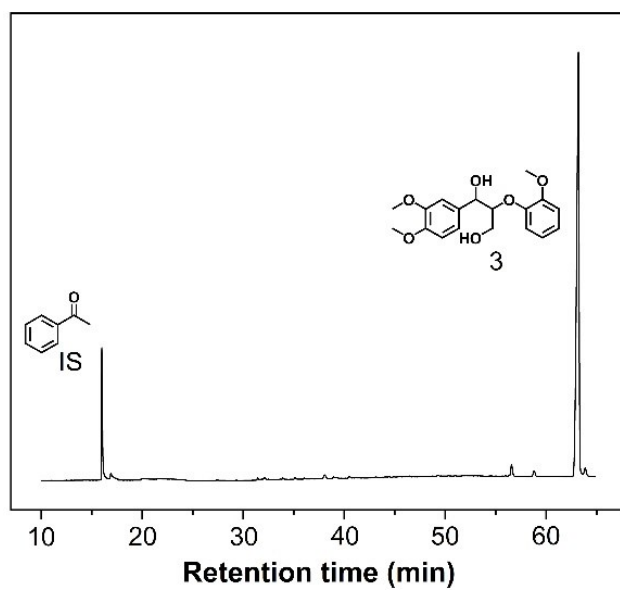

**Fig. S11** GC of degradation products of PPPD at 200 °C without catalyst.
